# Supplementary material for: Prognostic values of S100 family members in ovarian cancer patients
Source: BMC Cancer. 2018 Dec 17;18:1256. doi: 10.1186/s12885-018-5170-3 (PMC6296138; doi:10.1186/s12885-018-5170-3)
Supplement: Supplementary file 2 — Table S7. Patient numbers of low or high mRNA expression of S100 family members in different clinical and pathological features. Abbreviations: exp. -expression, n-number. (XLSX 41 kb) [file 12885_2018_5170_MOESM2_ESM.xlsx]

## Sheet: S100A1
Table S7: Patient number of low and high S100A1 mRNA expression in different clinical and pathological features.
Variance	Patient number (among different cohorts)
	Low expression	High expression
Stage
I+II (n=179)	65	70
III+IV (n=1268)	613	607
Grade
Grade I (n=56)	23	33
Grade II (n=325)	223	101
Grade III (n=1024)	542	473
Grade IV (n=21)	8	12
Debulk
Optimal (n=802)	335	466
Suboptimal (n=536)	243	293
Chemotherapy
Contains platin (n=1438)	642	767
Contains Taxol (n=821)	588	205
Contains Taxol+platin (n=804)	572	204
Contains Avastin (n=50)
Contains Docetaxel (n=108)	71	37
Contains Gemcitabine (n=135)	35	100
Contains Paclitaxel (n=248)	85	135
Contains Topotecan (n=119)	82	37
Subtype
Endometrioid (n=62)	27	10
Serous (n=1232)	623	584
Total
TP53 mutation
Mutated (n=516)	132	374
Wild type (n=102)	69	25
Average CA125 below lower quatile
Yes	135	260
All	816	840

## Sheet: S100A2
TableS7: Patient number of low and high S100A2 mRNA expression in different clinical and pathological features.
Variance	Patient number (among different cohorts)
	Low expression	High expression
Stage
I+II (n=179)	35	100
III+IV (n=1268)	736	484
Grade
Grade I (n=56)	39	17
Grade II (n=325)	80	244
Grade III (n=1024)	584	431
Grade IV (n=21)	5	15
Debulk
Optimal (n=802)	380	421
Suboptimal (n=536)	266	270
Chemotherapy
Contains platin (n=1438)	668	741
Contains Taxol (n=821)	391	402
Contains Taxol+platin (n=804)	352	424
Contains Avastin (n=50)
Contains Docetaxel (n=108)	48	60
Contains Gemcitabine (n=135)	51	84
Contains Paclitaxel (n=248)	84	136
Contains Topotecan (n=119)	61	58
Subtype
Endometrioid (n=62)	27	10
Serous (n=1232)	664	543
Total
TP53 mutation
Mutated (n=516)	127	379
Wild type (n=102)	69	25
Average CA125 below lower quartile
Yes	159	236
All	885	771

## Sheet: S100A3
Table S7: Patient number of low and high S100A3 mRNA expression in different clinical and pathological features.
Variance	Patient number (among different cohorts)
	Low expression	High expression
Stage
I+II (n=179)	43	92
III+IV (n=1268)	350	870
Grade
Grade I (n=56)	23	33
Grade II (n=325)	166	158
Grade III (n=1024)	319	696
Grade IV (n=21)	9	11
Debulk
Optimal (n=802)	225	576
Suboptimal (n=536)	272	264
Chemotherapy
Contains platin (n=1438)	352	1057
Contains Taxol (n=821)	210	583
Contains Taxol+platin (n=804)	210	566
Contains Avastin (n=50)
Contains Docetaxel (n=108)	65	43
Contains Gemcitabine (n=135)	99	36
Contains Paclitaxel (n=248)	101	119
Contains Topotecan (n=119)	30	89
Subtype
Endometrioid (n=62)	11	26
Serous (n=1232)	374	833
Total
TP53 mutation
Mutated (n=516)	373	133
Wild type (n=102)	29	65
Average CA125 below lower quatile
Yes	152	243
All	413	1243

## Sheet: S100A4
Table S7: Patient number of low and high S100A4 mRNA expression in different clinical and pathological features.
Variance	Patient number (among different cohorts)
	Low expression	High expression
Stage
I+II (n=179)	96	39
III+IV (n=1268)	345	875
Grade
Grade I (n=56)	41	15
Grade II (n=325)	233	91
Grade III (n=1024)	441	574
Grade IV (n=21)	11	9
Debulk
Optimal (n=802)	589	212
Suboptimal (n=536)	401	135
Chemotherapy
Contains platin (n=1438)	521	888
Contains Taxol (n=821)	241	552
Contains Taxol+platin (n=804)	234	542
Contains Avastin (n=50)
Contains Docetaxel (n=108)	70	38
Contains Gemcitabine (n=135)	47	88
Contains Paclitaxel (n=248)	114	106
Contains Topotecan (n=119)	37	82
Subtype
Endometrioid (n=62)	19	18
Serous (n=1232)	427	780
Total
TP53 mutation
Mutated (n=516)	171	335
Wild type (n=102)	25	69
Average CA125 below lower quatile
Yes	200	195
All	670	986

## Sheet: S100A5
Table S7: Patient number of low and high S100A5 mRNA expression in different clinical and pathological features.
Variance	Patient number (among different cohorts)
	Low expression	High expression
Stage
I+II (n=179)	65	70
III+IV (n=1268)	914	306
Grade
Grade I (n=56)	39	17
Grade II (n=325)	155	169
Grade III (n=1024)	255	760
Grade IV (n=21)	12	8
Debulk
Optimal (n=802)	389	412
Suboptimal (n=536)	386	150
Chemotherapy
Contains platin (n=1438)	1021	388
Contains Taxol (n=821)	594	199
Contains Taxol+platin (n=804)	581	195
Contains Avastin (n=50)
Contains Docetaxel (n=108)	43	65
Contains Gemcitabine (n=135)	85	50
Contains Paclitaxel (n=248)	99	121
Contains Topotecan (n=119)	86	33
Subtype
Endometrioid (n=62)	12	25
Serous (n=1232)	330	877
Total
TP53 mutation
Mutated (n=516)	367	139
Wild type (n=102)	69	25
Average CA125 below lower quatile
Yes	101	294
All	457	1199

## Sheet: S100A6
Table S7: Patient numbers of low or high mRNA expression of S100 family members in different clinical and pathological features
Variance	Patient number (among different cohorts)
	Low expression	High expression
Stage
I+II (n=179)	44	91
III+IV (n=1268)	821	399
Grade
Grade I (n=56)	13	43
Grade II (n=325)	227	97
Grade III (n=1024)	699	316
Grade IV (n=21)	10	10
Debulk
Optimal (n=802)	554	247
Suboptimal (n=536)	401	135
Chemotherapy
Contains platin (n=1438)	1047	362
Contains Taxol (n=821)	358	435
Contains Taxol+platin (n=804)	346	430
Contains Avastin (n=50)
Contains Docetaxel (n=108)	74	34
Contains Gemcitabine (n=135)	72	63
Contains Paclitaxel (n=248)	83	137
Contains Topotecan (n=119)	33	86
Subtype
Endometrioid (n=62)	15	22
Serous (n=1232)	882	325
Total
TP53 mutation
Mutated (n=516)	347	159
Wild type (n=102)	38	56
Average CA125 below lower quatile
Yes	243	152
All	1240	416

## Sheet: S100A7
Table S7: Patient number of low and high S100A7 mRNA expression in different clinical and pathological features.
Variance	Patient number (among different cohorts)
	Low expression	High expression
Stage
I+II (n=179)	76	59
III+IV (n=1268)	675	545
Grade
Grade I (n=56)	27	14
Grade II (n=325)	227	97
Grade III (n=1024)	564	451
Grade IV (n=21)	6	14
Debulk
Optimal (n=802)	248	553
Suboptimal (n=536)	382	154
Chemotherapy
Contains platin (n=1438)	685	724
Contains Taxol (n=821)	418	375
Contains Taxol+platin (n=804)	270	506
Contains Avastin (n=50)
Contains Docetaxel (n=108)	64	44
Contains Gemcitabine (n=135)	65	70
Contains Paclitaxel (n=248)
Contains Topotecan (n=119)	35	84
Subtype
Endometrioid (n=62)	17	20
Serous (n=1232)	729	478
Total
TP53 mutation
Mutated (n=516)	331	175
Wild type (n=102)	69	25
Average CA125 below lower quatile
Yes	155	240
All	845	811

## Sheet: S100A7A
TableS7: Patient number of low and high S1007A mRNA expression in different clinical and pathological features.
Variance	Patient number (among different cohorts)
	Low expression	High expression
Stage
I+II (n=179)	22	61
III+IV (n=1268)	161	326
Grade
Grade I (n=56)	32	24
Grade II (n=325)	72	90
Grade III (n=1024)	177	215
Grade IV (n=21)
Debulk
Optimal (n=802)	185	85
Suboptimal (n=536)	65	170
Chemotherapy
Contains platin (n=1438)	159	319
Contains Taxol (n=821)	98	259
Contains Taxol+platin (n=804)	98	258
Contains Avastin (n=50)
Contains Docetaxel (n=108)
Contains Gemcitabine (n=135)
Contains Paclitaxel (n=248)
Contains Topotecan (n=119)
Subtype
Endometrioid (n=62)	9	21
Serous (n=1232)	378	145
Total
TP53 mutation
Mutated (n=516)	83	41
Wild type (n=102)
Average CA125 below lower quatile
Yes	58	48
All	213	442

## Sheet: S100A8
Table S7: Patient number of low and high S100A8 mRNA expression in different clinical and pathological features.
Variance	Patient number (among different cohorts)
	Low expression	High expression
Stage
I+II (n=179)	57	78
III+IV (n=1268)	305	915
Grade
Grade I (n=56)	41	15
Grade II (n=325)	90	234
Grade III (n=1024)	318	697
Grade IV (n=21)	4	16
Debulk
Optimal (n=802)	315	486
Suboptimal (n=536)	364	172
Chemotherapy
Contains platin (n=1438)	539	870
Contains Taxol (n=821)	294	499
Contains Taxol+platin (n=804)	293	483
Contains Avastin (n=50)
Contains Docetaxel (n=108)	47	61
Contains Gemcitabine (n=135)	95	40
Contains Paclitaxel (n=248)	57	163
Contains Topotecan (n=119)	86	33
Subtype
Endometrioid (n=62)	25	12
Serous (n=1232)	348	859
Total
TP53 mutation
Mutated (n=516)	145	361
Wild type (n=102)	57	35
Average CA125 below lower quatile
Yes	214	181
All	643	1013

## Sheet: S100A9
Table S7: Patient number of low and high S100A9 mRNA expression in different clinical and pathological features.
Variance	Patient number (among different cohorts)
	Low expression	High expression
Stage
I+II (n=179)	39	96
III+IV (n=1268)	474	746
Grade
Grade I (n=56)	37	19
Grade II (n=325)	104	220
Grade III (n=1024)	427	588
Grade IV (n=21)	14	6
Debulk
Optimal (n=802)	260	541
Suboptimal (n=536)
Chemotherapy
Contains platin (n=1438)	750	659
Contains Taxol (n=821)	207	586
Contains Taxol+platin (n=804)	204	572
Contains Avastin (n=50)
Contains Docetaxel (n=108)	55	53
Contains Gemcitabine (n=135)	97	38
Contains Paclitaxel (n=248)
Contains Topotecan (n=119)	86	33
Subtype
Endometrioid (n=62)	8	29
Serous (n=1232)	448	759
Total
TP53 mutation
Mutated (n=516)	192	314
Wild type (n=102)	50	44
Average CA125 below lower quatile
Yes	226	169
All	578	1078

[truncated: 10 more sheets: S100A10, S100A11, S100A12, S100A13, S100A14, S100A16, S100B, S100G, S100P, S100Z]
